# Supplementary material
Source: Springer Nature journal article supplement (https://www.springermedizin.de/resource/supplementary/13006_2012_141_MOESM1_ESM.pdf/9628060)

Proportion of infants 0-5 months who were exclusively breastfed (percentage)

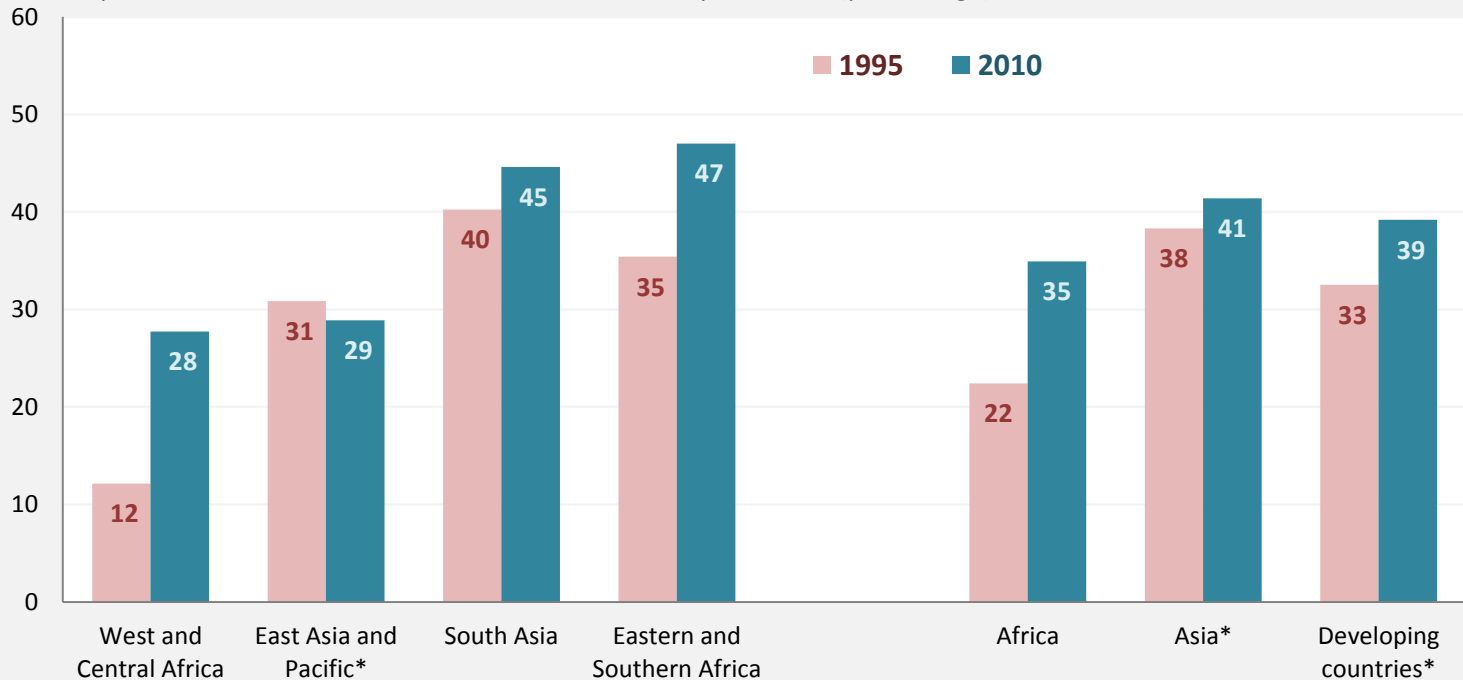

Supplement: MOESM1 [file 9628060]
